# Supplementary material for: Pharmaceutical Care Adoption in Community Pharmacies: Cross-Sectional Study Assessment of Challenges and Opportunities, Wad-Madani, Sudan
Source: Research Square preprint supplement (doi:10.21203/rs.3.rs-7680249/v1), 2026-02-03
Supplement: Supplementary file 1 [file ea40f9f61c70af0f6d89576f.xlsx]

## Sheet: Form Responses 1 (2)
Pharmcy Group	Sex [Gender]	Age range (in years) [Age ranges]	Professional scientific degree at current time: [Degrees available]	Experience in community pharmacy practice(in years): [Years of experience range]	Actual activities of the pharmacist within community pharmacy(at time of visiting) [Activities ]	Cashier	Dispensing Medicines	Counselling	Managing	What is pharmaceutical care practice ? [Background of pharmaceutical care]	[Background of pharmaceutical care]True or false	The major supporting factor for pharmaceutical care practice usually is: [supporting factors to practice PC]	What is the major barrier regarding pharmacists' do you think discouraging pharmaceutical care practice implementation: [Barriers discouraging PC practice]	The main factor (not of pharmacists) discouraging provision of pharmaceutical care services at community pharmacy at current time is: [Factors discouraging pharmaceutical care provision at community pharmacy]	Select one of the following recommendations you think the most important one to implement pharmaceutical care model at community pharmacy in Sudan: [Row 1]
Living Area Pharmacy	Female	≤21 to 40	Bachelor	≤ 10	Cashier, drug dispenser,counsellor and manager.	Yes	Yes	Yes	Yes	Patient cantered and outcome oriented practice of pharmacists	TRUE	The desire and willingness of pharmacists have strong	Curriculum of pharmacy	Other health care providers	The community pharmacy design and structure should contain separate counselling area for pharmaceutical care practice.
Living Area Pharmacy	Female	≤21 to 40	Bachelor	≤ 10	Drug dispenser, counsellor and cashier.	Yes	Yes	Yes	No	Dispensary practice	FALSE	The helpfulness of the pharmacy environment and structure.	Lack of communication skills	Absence of reimbursement for provided service	Pharmacists who work in community pharmacy should be well trained and updated through CPD (Continuous Professional Development) programs.
Main Market of Wad Madani Town	Female	≤21 to 40	Bachelor	≤ 10	Drug dispenser, counsellor and cashier.	Yes	Yes	Yes	No	Patient cantered and outcome oriented practice of pharmacists	TRUE	The organized Pharmacy staff members towards their responsibility.	Lack of time	Other health care providers	Professional relationship between community pharmacists and other health care providers should be improved and maintained.
Main Market of Wad Madani Town	Female	≤21 to 40	Bachelor	≤ 10	Cashier, drug dispenser,counsellor and manager.	Yes	Yes	Yes	Yes	counselling practice	TRUE	The organized Pharmacy staff members towards their responsibility.	Lack of knowledge	Lack of information technology	Community pharmacy staff members should be complete and well organized.
Living Area Pharmacy	Female	≤21 to 40	Bachelor	≤ 10	Drug dispenser, counsellor and cashier.	Yes	Yes	Yes	No	Patient cantered and outcome oriented practice of pharmacists	TRUE	The effective and helpful regulatory bodies.	Lack of continuous professional development	Community pharmacy structure and design	Regulatory bodies must be helpful in implementing effective pharmaceutical care practice.
Living Area Pharmacy	Male	41 to 60	M.Sc.	11 to 20	Drug dispenser, counsellor and cashier.	Yes	Yes	Yes	No	Patient cantered and outcome oriented practice of pharmacists	TRUE	The effective and helpful regulatory bodies.	Lack of continuous professional development	Lack of information technology	Pharmacists who work in community pharmacy should be well trained and updated through CPD (Continuous Professional Development) programs.
Living Area Pharmacy	Female	≤21 to 40	Bachelor	≤ 10	Cashier, drug dispenser,counsellor and manager.	Yes	Yes	Yes	Yes	Store management practice	FALSE	The organized Pharmacy staff members towards their responsibility.	Lack of continuous professional development	Patients perceptions and backgrounds	Professional relationship between community pharmacists and other health care providers should be improved and maintained.
Living Area Pharmacy	Female	41 to 60	Bachelor	≤ 10	Cashier, drug dispenser,counsellor and manager.	Yes	Yes	Yes	Yes	Dispensary practice	FALSE	The organized Pharmacy staff members towards their responsibility.	Lack of time	Lack of information technology	Professional relationship between community pharmacists and other health care providers should be improved and maintained.
Main Market of Wad Madani Town	Female	≤21 to 40	Bachelor	≤ 10	Drug dispenser, counsellor and cashier.	Yes	Yes	Yes	No	Patient cantered and outcome oriented practice of pharmacists	TRUE	The desire and willingness of pharmacists have strong	Lack of communication skills	Other health care providers	Professional relationship between community pharmacists and other health care providers should be improved and maintained.
Living Area Pharmacy	Female	≤21 to 40	Bachelor	≤ 10	Drug dispenser, counsellor and cashier.	Yes	Yes	Yes	No	Patient cantered and outcome oriented practice of pharmacists	TRUE	The helpfulness of the pharmacy environment and structure.	Lack of continuous professional development	Community pharmacy structure and design	Awareness of community pharmacy practitioners should be increased through lectures and workshops.
Main Market of Wad Madani Town	Male	≤21 to 40	Bachelor	≤ 10	Cashier, drug dispenser,counsellor and manager.	Yes	Yes	Yes	Yes	counselling practice	TRUE	The organized Pharmacy staff members towards their responsibility.	Lack of continuous professional development	Other pharmacy staff members	The community pharmacy design and structure should contain separate counselling area for pharmaceutical care practice.
Main Market of Wad Madani Town	Female	≤21 to 40	Bachelor	≤ 10	Drug dispenser, counsellor and cashier.	Yes	Yes	Yes	No	counselling practice	TRUE	The desire and willingness of pharmacists have strong	Lack of knowledge	Other pharmacy staff members	Pharmacists who work in community pharmacy should be well trained and updated through CPD (Continuous Professional Development) programs.
Main Market of Wad Madani Town	Male	≤21 to 40	Bachelor	≤ 10	Drug dispenser, counsellor and cashier.	Yes	Yes	Yes	No	Patient cantered and outcome oriented practice of pharmacists	TRUE	The effective and helpful regulatory bodies.	Lack of knowledge	Patients perceptions and backgrounds	Awareness of community pharmacy practitioners should be increased through lectures and workshops.
Main Market of Wad Madani Town	Female	≤21 to 40	Bachelor	≤ 10	Drug dispenser, counsellor and cashier.	Yes	Yes	Yes	No	Patient cantered and outcome oriented practice of pharmacists	TRUE	The organized Pharmacy staff members towards their responsibility.	Lack of knowledge	Lack of information technology	Pharmacists who work in community pharmacy should be well trained and updated through CPD (Continuous Professional Development) programs.
Living Area Pharmacy	Male	≤21 to 40	Bachelor	≤ 10	Drug dispenser, counsellor and cashier.	Yes	Yes	Yes	No	Patient cantered and outcome oriented practice of pharmacists	TRUE	The helpfulness of the pharmacy environment and structure.	None of these factors	Patients perceptions and backgrounds	Professional relationship between community pharmacists and other health care providers should be improved and maintained.
Living Area Pharmacy	Female	≤21 to 40	Bachelor	≤ 10	Drug dispenser, counsellor and cashier.	Yes	Yes	Yes	No	counselling practice	TRUE	The desire and willingness of pharmacists have strong	Lack of continuous professional development	Community pharmacy structure and design	The community pharmacy design and structure should contain separate counselling area for pharmaceutical care practice.
Main Market of Wad Madani Town	Female	≤21 to 40	Bachelor	≤ 10	Cashier, drug dispenser,counsellor and manager.	Yes	Yes	Yes	Yes	counselling practice	TRUE	The desire and willingness of pharmacists have strong	Lack of training	Other pharmacy staff members	Pharmacists who work in community pharmacy should be well trained and updated through CPD (Continuous Professional Development) programs.
Main Market of Wad Madani Town	Female	≤21 to 40	Bachelor	≤ 10	Cashier, drug dispenser,counsellor and manager.	Yes	Yes	Yes	Yes	Patient cantered and outcome oriented practice of pharmacists	TRUE	The organized Pharmacy staff members towards their responsibility.	Lack of training	Community pharmacy structure and design	Pharmacists who work in community pharmacy should be well trained and updated through CPD (Continuous Professional Development) programs.
Main Market of Wad Madani Town	Male	≤21 to 40	Bachelor	≤ 10	Cashier, drug dispenser,counsellor and manager.	Yes	Yes	Yes	Yes	counselling practice	TRUE	The organized Pharmacy staff members towards their responsibility.	Lack of continuous professional development	Patients perceptions and backgrounds	Awareness of community pharmacy practitioners should be increased through lectures and workshops.
Main Market of Wad Madani Town	Male	≤21 to 40	Bachelor	≤ 10	Cashier, drug dispenser,counsellor and manager.	Yes	Yes	Yes	Yes	Patient cantered and outcome oriented practice of pharmacists	TRUE	The organized Pharmacy staff members towards their responsibility.	Lack of time	Absence of reimbursement for provided service	Pharmacists who work in community pharmacy should be well trained and updated through CPD (Continuous Professional Development) programs.
Living Area Pharmacy	Female	≤21 to 40	Bachelor	11 to 20	Cashier, drug dispenser,counsellor and manager.	Yes	Yes	Yes	Yes	Dispensary practice	FALSE	The helpfulness of the pharmacy environment and structure.	None of these factors	Absence of reimbursement for provided service	Pharmacists who work in community pharmacy should be well trained and updated through CPD (Continuous Professional Development) programs.
Living Area Pharmacy	Female	≤21 to 40	Bachelor	≤ 10	Drug dispenser, counsellor and cashier.	Yes	Yes	Yes	No	Patient cantered and outcome oriented practice of pharmacists	TRUE	The helpfulness of the pharmacy environment and structure.	Lack of knowledge	Community pharmacy structure and design	The community pharmacy design and structure should contain separate counselling area for pharmaceutical care practice.
Living Area Pharmacy	Female	≤21 to 40	Bachelor	≤ 10	Cashier, drug dispenser,counsellor and manager.	Yes	Yes	Yes	Yes	counselling practice	TRUE	The helpfulness of the pharmacy environment and structure.	Lack of training	Patients perceptions and backgrounds	Pharmacists who work in community pharmacy should be well trained and updated through CPD (Continuous Professional Development) programs.
Main Market of Wad Madani Town	Female	≤21 to 40	Bachelor	≤ 10	Drug dispenser, counsellor and cashier.	Yes	Yes	Yes	No	Dispensary practice	FALSE	The organized Pharmacy staff members towards their responsibility.	Lack of continuous professional development	Lack of information technology	Pharmacists who work in community pharmacy should be well trained and updated through CPD (Continuous Professional Development) programs.
Living Area Pharmacy	Male	41 to 60	PhD	21 to 30	Drug dispenser, counsellor and cashier.	Yes	Yes	Yes	No	Dispensary practice	FALSE	The organized Pharmacy staff members towards their responsibility.	Lack of communication skills	Absence of reimbursement for provided service	Awareness of community pharmacy practitioners should be increased through lectures and workshops.
Main Market of Wad Madani Town	Female	≤21 to 40	Bachelor	≤ 10	Drug dispenser, counsellor and cashier.	Yes	Yes	Yes	No	Dispensary practice	FALSE	The organized Pharmacy staff members towards their responsibility.	Lack of communication skills	Community pharmacy structure and design	Awareness of community pharmacy practitioners should be increased through lectures and workshops.
Main Market of Wad Madani Town	Female	≤21 to 40	Bachelor	≤ 10	Drug dispenser, counsellor and cashier.	Yes	Yes	Yes	No	Dispensary practice	FALSE	The helpfulness of the pharmacy environment and structure.	Lack of knowledge	Other health care providers	The community pharmacy design and structure should contain separate counselling area for pharmaceutical care practice.
Main Market of Wad Madani Town	Female	≤21 to 40	Bachelor	≤ 10	Drug dispenser, counsellor and cashier.	Yes	Yes	Yes	No	Patient cantered and outcome oriented practice of pharmacists	TRUE	The desire and willingness of pharmacists have strong	Lack of continuous professional development	Patients perceptions and backgrounds	Pharmacists who work in community pharmacy should be well trained and updated through CPD (Continuous Professional Development) programs.
Main Market of Wad Madani Town	Female	≤21 to 40	Bachelor	≤ 10	Cashier, drug dispenser,counsellor and manager.	Yes	Yes	Yes	Yes	Patient cantered and outcome oriented practice of pharmacists	TRUE	The helpfulness of the pharmacy environment and structure.	Lack of training	Absence of reimbursement for provided service	Pharmacists who work in community pharmacy should be well trained and updated through CPD (Continuous Professional Development) programs.
Main Market of Wad Madani Town	Female	≤21 to 40	Bachelor	≤ 10	Drug dispenser, counsellor and cashier.	Yes	Yes	Yes	No	Patient cantered and outcome oriented practice of pharmacists	TRUE	The helpfulness of the pharmacy environment and structure.	None of these factors	Absence of reimbursement for provided service	The community pharmacy design and structure should contain separate counselling area for pharmaceutical care practice.
Main Market of Wad Madani Town	Female	≤21 to 40	Bachelor	≤ 10	Drug dispenser, counsellor and cashier.	Yes	Yes	Yes	No	counselling practice	TRUE	The helpfulness of the pharmacy environment and structure.	Lack of training	Community pharmacy structure and design	Pharmacists who work in community pharmacy should be well trained and updated through CPD (Continuous Professional Development) programs.
Main Market of Wad Madani Town	Female	≤21 to 40	Bachelor	≤ 10	Drug dispenser, counsellor and cashier.	Yes	Yes	Yes	No	Dispensary practice	FALSE	The organized Pharmacy staff members towards their responsibility.	Lack of knowledge	Patients perceptions and backgrounds	Pharmacists who work in community pharmacy should be well trained and updated through CPD (Continuous Professional Development) programs.
Main Market of Wad Madani Town	Female	≤21 to 40	Bachelor	≤ 10	Drug dispenser, counsellor and cashier.	Yes	Yes	Yes	No	Patient cantered and outcome oriented practice of pharmacists	TRUE	The helpfulness of the pharmacy environment and structure.	Lack of time	Patients perceptions and backgrounds	Pharmacists who work in community pharmacy should be well trained and updated through CPD (Continuous Professional Development) programs.
Main Market of Wad Madani Town	Female	≤21 to 40	M.Sc.	≤ 10	Cashier, drug dispenser,counsellor and manager.	Yes	Yes	Yes	Yes	Store management practice	FALSE	The organized Pharmacy staff members towards their responsibility.	Lack of training	Community pharmacy structure and design	Awareness of community pharmacy practitioners should be increased through lectures and workshops.
Main Market of Wad Madani Town	Female	≤21 to 40	Bachelor	≤ 10	Drug dispenser, counsellor and cashier.	Yes	Yes	Yes	No	Patient cantered and outcome oriented practice of pharmacists	TRUE	The desire and willingness of pharmacists have strong	Lack of time	Community pharmacy structure and design	Pharmacists who work in community pharmacy should be well trained and updated through CPD (Continuous Professional Development) programs.
Main Market of Wad Madani Town	Female	≤21 to 40	Bachelor	≤ 10	Cashier, drug dispenser,counsellor and manager.	Yes	Yes	Yes	Yes	counselling practice	TRUE	The desire and willingness of pharmacists have strong	Lack of continuous professional development	Community pharmacy structure and design	The community pharmacy design and structure should contain separate counselling area for pharmaceutical care practice.
Main Market of Wad Madani Town	Male	≤21 to 40	Bachelor	≤ 10	Drug dispenser, counsellor and cashier.	Yes	Yes	Yes	No	counselling practice	TRUE	The organized Pharmacy staff members towards their responsibility.	Lack of time	Patients perceptions and backgrounds	Pharmacists who work in community pharmacy should be well trained and updated through CPD (Continuous Professional Development) programs.
Main Market of Wad Madani Town	Female	≤21 to 40	Bachelor	≤ 10	Cashier, drug dispenser,counsellor and manager.	Yes	Yes	Yes	Yes	counselling practice	TRUE	The desire and willingness of pharmacists have strong	Lack of knowledge	Absence of reimbursement for provided service	Pharmacists who work in community pharmacy should be well trained and updated through CPD (Continuous Professional Development) programs.
Main Market of Wad Madani Town	Male	41 to 60	Bachelor	≤ 10	Drug dispenser, counsellor and cashier.	Yes	Yes	Yes	No	Patient cantered and outcome oriented practice of pharmacists	TRUE	The organized Pharmacy staff members towards their responsibility.	Curriculum of pharmacy	Community pharmacy structure and design	The community pharmacy design and structure should contain separate counselling area for pharmaceutical care practice.
Main Market of Wad Madani Town	Female	≤21 to 40	Bachelor	≤ 10	Drug dispenser, counsellor and cashier.	Yes	Yes	Yes	No	Patient cantered and outcome oriented practice of pharmacists	TRUE	The organized Pharmacy staff members towards their responsibility.	Lack of knowledge	Other pharmacy staff members	Awareness of community pharmacy practitioners should be increased through lectures and workshops.
Living Area Pharmacy	Female	≤21 to 40	Bachelor	≤ 10	Cashier, drug dispenser,counsellor and manager.	Yes	Yes	Yes	Yes	Patient cantered and outcome oriented practice of pharmacists	TRUE	The helpfulness of the pharmacy environment and structure.	Lack of knowledge	Community pharmacy structure and design	Pharmacists who work in community pharmacy should be well trained and updated through CPD (Continuous Professional Development) programs.
Main Market of Wad Madani Town	Female	≤21 to 40	Bachelor	≤ 10	Cashier, drug dispenser,counsellor and manager.	Yes	Yes	Yes	Yes	Patient cantered and outcome oriented practice of pharmacists	TRUE	The desire and willingness of pharmacists have strong	Lack of continuous professional development	Other health care providers	Pharmacists who work in community pharmacy should be well trained and updated through CPD (Continuous Professional Development) programs.
Main Market of Wad Madani Town	Female	≤21 to 40	Bachelor	≤ 10	Cashier, drug dispenser,counsellor and manager.	Yes	Yes	Yes	Yes	Patient cantered and outcome oriented practice of pharmacists	TRUE	The organized Pharmacy staff members towards their responsibility.	Lack of continuous professional development	Community pharmacy structure and design	Professional relationship between community pharmacists and other health care providers should be improved and maintained.
Living Area Pharmacy	Female	≤21 to 40	Bachelor	≤ 10	Cashier, drug dispenser,counsellor and manager.	Yes	Yes	Yes	Yes	counselling practice	TRUE	The organized Pharmacy staff members towards their responsibility.	Lack of knowledge	Lack of information technology	Awareness of community pharmacy practitioners should be increased through lectures and workshops.
Main Market of Wad Madani Town	Female	≤21 to 40	Bachelor	≤ 10	Cashier, drug dispenser,counsellor and manager.	Yes	Yes	Yes	Yes	Store management practice	FALSE	The organized Pharmacy staff members towards their responsibility.	Lack of confidence	Other pharmacy staff members	Community pharmacy staff members should be complete and well organized.
Living Area Pharmacy	Female	≤21 to 40	Bachelor	≤ 10	Cashier, drug dispenser,counsellor and manager.	Yes	Yes	Yes	Yes	Dispensary practice	FALSE	The organized Pharmacy staff members towards their responsibility.	Lack of time	Lack of information technology	Pharmacists who work in community pharmacy should be well trained and updated through CPD (Continuous Professional Development) programs.
Living Area Pharmacy	Female	≤21 to 40	Bachelor	≤ 10	Cashier, drug dispenser,counsellor and manager.	Yes	Yes	Yes	Yes	Patient cantered and outcome oriented practice of pharmacists	TRUE	The organized Pharmacy staff members towards their responsibility.	Lack of continuous professional development	Patients perceptions and backgrounds	Community pharmacy staff members should be complete and well organized.
Living Area Pharmacy	Male	41 to 60	Bachelor	11 to 20	Cashier, drug dispenser,counsellor and manager.	Yes	Yes	Yes	Yes	Patient cantered and outcome oriented practice of pharmacists	TRUE	The organized Pharmacy staff members towards their responsibility.	Lack of continuous professional development	Lack of information technology	Professional relationship between community pharmacists and other health care providers should be improved and maintained.
Living Area Pharmacy	Male	41 to 60	M.Sc.	21 to 30	Cashier, drug dispenser,counsellor and manager.	Yes	Yes	Yes	Yes	Patient cantered and outcome oriented practice of pharmacists	TRUE	The desire and willingness of pharmacists have strong	Curriculum of pharmacy	Patients perceptions and backgrounds	Pharmacists who work in community pharmacy should be well trained and updated through CPD (Continuous Professional Development) programs.
Living Area Pharmacy	Female	≤21 to 40	Bachelor	≤ 10	Cashier, drug dispenser,counsellor and manager.	Yes	Yes	Yes	Yes	Patient cantered and outcome oriented practice of pharmacists	TRUE	The organized Pharmacy staff members towards their responsibility.	Lack of continuous professional development	Lack of information technology	Pharmacists who work in community pharmacy should be well trained and updated through CPD (Continuous Professional Development) programs.
Living Area Pharmacy	Female	≤21 to 40	Bachelor	≤ 10	Drug dispenser, counsellor and cashier.	Yes	Yes	Yes	No	Patient cantered and outcome oriented practice of pharmacists	TRUE	The organized Pharmacy staff members towards their responsibility.	Lack of knowledge	Community pharmacy structure and design	Awareness of community pharmacy practitioners should be increased through lectures and workshops.
Living Area Pharmacy	Male	≤21 to 40	Bachelor	≤ 10	Cashier, drug dispenser,counsellor and manager.	Yes	Yes	Yes	Yes	Patient cantered and outcome oriented practice of pharmacists	TRUE	The helpfulness of the pharmacy environment and structure.	Curriculum of pharmacy	Community pharmacy structure and design	The community pharmacy design and structure should contain separate counselling area for pharmaceutical care practice.
Living Area Pharmacy	Female	41 to 60	M.Sc.	11 to 20	Cashier, drug dispenser,counsellor and manager.	Yes	Yes	Yes	Yes	Patient cantered and outcome oriented practice of pharmacists	TRUE	The organized Pharmacy staff members towards their responsibility.	Lack of continuous professional development	Community pharmacy structure and design	Awareness of community pharmacy practitioners should be increased through lectures and workshops.
Living Area Pharmacy	Male	41 to 60	Bachelor	11 to 20	Cashier, drug dispenser,counsellor and manager.	Yes	Yes	Yes	Yes	Dispensary practice	FALSE	The helpfulness of the pharmacy environment and structure.	Lack of communication skills	Lack of information technology	The community pharmacy design and structure should contain separate counselling area for pharmaceutical care practice.
Living Area Pharmacy	Male	41 to 60	M.Sc.	11 to 20	Drug dispenser, counsellor and cashier.	Yes	Yes	Yes	No	Patient cantered and outcome oriented practice of pharmacists	TRUE	The organized Pharmacy staff members towards their responsibility.	Lack of communication skills	Absence of reimbursement for provided service	Professional relationship between community pharmacists and other health care providers should be improved and maintained.
Living Area Pharmacy	Female	≤21 to 40	Bachelor	11 to 20	Cashier, drug dispenser,counsellor and manager.	Yes	Yes	Yes	Yes	Patient cantered and outcome oriented practice of pharmacists	TRUE	The organized Pharmacy staff members towards their responsibility.	Lack of time	Other health care providers	Professional relationship between community pharmacists and other health care providers should be improved and maintained.
Living Area Pharmacy	Female	≤21 to 40	Bachelor	≤ 10	Cashier, drug dispenser,counsellor and manager.	Yes	Yes	Yes	Yes	Dispensary practice	FALSE	The helpfulness of the pharmacy environment and structure.	Lack of knowledge	Lack of information technology	The community pharmacy design and structure should contain separate counselling area for pharmaceutical care practice.
Living Area Pharmacy	Female	≤21 to 40	Bachelor	≤ 10	Cashier, drug dispenser,counsellor and manager.	Yes	Yes	Yes	Yes	Patient cantered and outcome oriented practice of pharmacists	TRUE	The helpfulness of the pharmacy environment and structure.	Lack of continuous professional development	Absence of reimbursement for provided service	The community pharmacy design and structure should contain separate counselling area for pharmaceutical care practice.
Main Market of Wad Madani Town	Female	≤21 to 40	Bachelor	≤ 10	Drug dispenser, counsellor and cashier.	Yes	Yes	Yes	No	Patient cantered and outcome oriented practice of pharmacists	TRUE	The helpfulness of the pharmacy environment and structure.	Lack of knowledge	Patients perceptions and backgrounds	Professional relationship between community pharmacists and other health care providers should be improved and maintained.
Living Area Pharmacy	Male	≤21 to 40	Bachelor	≤ 10	Cashier, drug dispenser,counsellor and manager.	Yes	Yes	Yes	Yes	counselling practice	TRUE	The organized Pharmacy staff members towards their responsibility.	Lack of knowledge	Lack of information technology	Pharmacists who work in community pharmacy should be well trained and updated through CPD (Continuous Professional Development) programs.
Living Area Pharmacy	Male	≤21 to 40	Bachelor	≤ 10	Drug dispenser, counsellor and cashier.	Yes	Yes	Yes	No	Patient cantered and outcome oriented practice of pharmacists	TRUE	The helpfulness of the pharmacy environment and structure.	Lack of continuous professional development	Community pharmacy structure and design	Pharmacists who work in community pharmacy should be well trained and updated through CPD (Continuous Professional Development) programs.
Living Area Pharmacy	Female	≤21 to 40	Bachelor	≤ 10	Drug dispenser, counsellor and cashier.	Yes	Yes	Yes	No	Store management practice	FALSE	The desire and willingness of pharmacists have strong	Lack of continuous professional development	Patients perceptions and backgrounds	Professional relationship between community pharmacists and other health care providers should be improved and maintained.
Living Area Pharmacy	Male	≤21 to 40	Bachelor	≤ 10	Cashier, drug dispenser,counsellor and manager.	Yes	Yes	Yes	Yes	Patient cantered and outcome oriented practice of pharmacists	TRUE	The organized Pharmacy staff members towards their responsibility.	Lack of continuous professional development	Community pharmacy structure and design	Pharmacists who work in community pharmacy should be well trained and updated through CPD (Continuous Professional Development) programs.
Living Area Pharmacy	Female	≤21 to 40	Bachelor	≤ 10	Cashier, drug dispenser,counsellor and manager.	Yes	Yes	Yes	Yes	counselling practice	TRUE	The organized Pharmacy staff members towards their responsibility.	Lack of communication skills	Patients perceptions and backgrounds	Awareness of community pharmacy practitioners should be increased through lectures and workshops.
Living Area Pharmacy	Female	≤21 to 40	Bachelor	≤ 10	Drug dispenser, counsellor and cashier.	Yes	Yes	Yes	No	Patient cantered and outcome oriented practice of pharmacists	TRUE	The organized Pharmacy staff members towards their responsibility.	None of these factors	Patients perceptions and backgrounds	Community pharmacy staff members should be complete and well organized.
Living Area Pharmacy	Male	61 ≤	Bachelor	≥ 40	Cashier, drug dispenser,counsellor and manager.	Yes	Yes	Yes	Yes	counselling practice	TRUE	The desire and willingness of pharmacists have strong	Lack of continuous professional development	Patients perceptions and backgrounds	Pharmacists who work in community pharmacy should be well trained and updated through CPD (Continuous Professional Development) programs.
Main Market of Wad Madani Town	Female	≤21 to 40	Bachelor	≤ 10	Cashier, drug dispenser,counsellor and manager.	Yes	Yes	Yes	Yes	Patient cantered and outcome oriented practice of pharmacists	TRUE	The organized Pharmacy staff members towards their responsibility.	Lack of time	Community pharmacy structure and design	Professional relationship between community pharmacists and other health care providers should be improved and maintained.
Living Area Pharmacy	Female	≤21 to 40	Bachelor	11 to 20	Drug dispenser, counsellor and cashier.	Yes	Yes	Yes	No	counselling practice	TRUE	The organized Pharmacy staff members towards their responsibility.	None of these factors	Patients perceptions and backgrounds	Pharmacists who work in community pharmacy should be well trained and updated through CPD (Continuous Professional Development) programs.
Main Market of Wad Madani Town	Male	≤21 to 40	Bachelor	≤ 10	Drug dispenser, counsellor and cashier.	Yes	Yes	Yes	No	Patient cantered and outcome oriented practice of pharmacists	TRUE	The organized Pharmacy staff members towards their responsibility.	None of these factors	Patients perceptions and backgrounds	Professional relationship between community pharmacists and other health care providers should be improved and maintained.
Living Area Pharmacy	Female	≤21 to 40	Bachelor	≤ 10	Drug dispenser, counsellor and cashier.	Yes	Yes	Yes	No	Patient cantered and outcome oriented practice of pharmacists	TRUE	The organized Pharmacy staff members towards their responsibility.	Lack of confidence	Community pharmacy structure and design	Pharmacists who work in community pharmacy should be well trained and updated through CPD (Continuous Professional Development) programs.
Living Area Pharmacy	Male	41 to 60	Bachelor	≤ 10	Cashier, drug dispenser,counsellor and manager.	Yes	Yes	Yes	Yes	Patient cantered and outcome oriented practice of pharmacists	TRUE	The desire and willingness of pharmacists have strong	Lack of continuous professional development	Lack of information technology	Awareness of community pharmacy practitioners should be increased through lectures and workshops.
Living Area Pharmacy	Female	≤21 to 40	M.Sc.	≤ 10	Cashier, drug dispenser,counsellor and manager.	Yes	Yes	Yes	Yes	Patient cantered and outcome oriented practice of pharmacists	TRUE	The organized Pharmacy staff members towards their responsibility.	None of these factors	Community pharmacy structure and design	The community pharmacy design and structure should contain separate counselling area for pharmaceutical care practice.
Main Market of Wad Madani Town	Female	≤21 to 40	Bachelor	≤ 10	Drug dispenser, counsellor and cashier.	Yes	Yes	Yes	No	counselling practice	TRUE	The helpfulness of the pharmacy environment and structure.	Lack of confidence	Lack of information technology	The community pharmacy design and structure should contain separate counselling area for pharmaceutical care practice.
Living Area Pharmacy	Female	≤21 to 40	Bachelor	≤ 10	Drug dispenser, counsellor and cashier.	Yes	Yes	Yes	No	Patient cantered and outcome oriented practice of pharmacists	TRUE	The organized Pharmacy staff members towards their responsibility.	Lack of continuous professional development	Other health care providers	Pharmacists who work in community pharmacy should be well trained and updated through CPD (Continuous Professional Development) programs.
Living Area Pharmacy	Male	41 to 60	Bachelor	11 to 20	Cashier, drug dispenser,counsellor and manager.	Yes	Yes	Yes	Yes	Patient cantered and outcome oriented practice of pharmacists	TRUE	The organized Pharmacy staff members towards their responsibility.	Lack of communication skills	Patients perceptions and backgrounds	Pharmacists who work in community pharmacy should be well trained and updated through CPD (Continuous Professional Development) programs.
Living Area Pharmacy	Male	≤21 to 40	Bachelor	11 to 20	Drug dispenser, counsellor and cashier.	Yes	Yes	Yes	No	Patient cantered and outcome oriented practice of pharmacists	TRUE	The desire and willingness of pharmacists have strong	Lack of continuous professional development	Patients perceptions and backgrounds	The community pharmacy design and structure should contain separate counselling area for pharmaceutical care practice.
Living Area Pharmacy	Female	≤21 to 40	Bachelor	≤ 10	Drug dispenser, counsellor and cashier.	Yes	Yes	Yes	No	Patient cantered and outcome oriented practice of pharmacists	TRUE	The organized Pharmacy staff members towards their responsibility.	Lack of time	Lack of information technology	Pharmacists who work in community pharmacy should be well trained and updated through CPD (Continuous Professional Development) programs.
Living Area Pharmacy	Male	≤21 to 40	Bachelor	11 to 20	Cashier, drug dispenser,counsellor and manager.	Yes	Yes	Yes	Yes	Patient cantered and outcome oriented practice of pharmacists	TRUE	The helpfulness of the pharmacy environment and structure.	Curriculum of pharmacy	Absence of reimbursement for provided service	Awareness of community pharmacy practitioners should be increased through lectures and workshops.
Main Market of Wad Madani Town	Male	41 to 60	Bachelor	≥ 40	Cashier, drug dispenser,counsellor and manager.	Yes	Yes	Yes	Yes	counselling practice	TRUE	The organized Pharmacy staff members towards their responsibility.	Lack of continuous professional development	Patients perceptions and backgrounds	Pharmacists who work in community pharmacy should be well trained and updated through CPD (Continuous Professional Development) programs.
Living Area Pharmacy	Female	≤21 to 40	Bachelor	≤ 10	Drug dispenser, counsellor and cashier.	Yes	Yes	Yes	No	Patient cantered and outcome oriented practice of pharmacists	TRUE	The organized Pharmacy staff members towards their responsibility.	Lack of continuous professional development	Community pharmacy structure and design	Pharmacists who work in community pharmacy should be well trained and updated through CPD (Continuous Professional Development) programs.
Main Market of Wad Madani Town	Female	≤21 to 40	Bachelor	≤ 10	Drug dispenser, counsellor and cashier.	Yes	Yes	Yes	No	Patient cantered and outcome oriented practice of pharmacists	TRUE	The desire and willingness of pharmacists have strong	Lack of knowledge	Patients perceptions and backgrounds	Pharmacists who work in community pharmacy should be well trained and updated through CPD (Continuous Professional Development) programs.
Living Area Pharmacy	Female	≤21 to 40	Bachelor	≤ 10	Cashier, drug dispenser,counsellor and manager.	Yes	Yes	Yes	Yes	Dispensary practice	FALSE	The organized Pharmacy staff members towards their responsibility.	Lack of continuous professional development	Patients perceptions and backgrounds	Professional relationship between community pharmacists and other health care providers should be improved and maintained.
Living Area Pharmacy	Male	61 ≤	Bachelor	≥ 40	Cashier, drug dispenser,counsellor and manager.	Yes	Yes	Yes	Yes	Dispensary practice	FALSE	The desire and willingness of pharmacists have strong	Lack of continuous professional development	Absence of reimbursement for provided service	Awareness of community pharmacy practitioners should be increased through lectures and workshops.
Living Area Pharmacy	Male	≤21 to 40	Bachelor	≤ 10	Drug dispenser, counsellor and cashier.	Yes	Yes	Yes	No	Patient cantered and outcome oriented practice of pharmacists	TRUE	The helpfulness of the pharmacy environment and structure.	Lack of continuous professional development	Patients perceptions and backgrounds	Community pharmacy staff members should be complete and well organized.
Main Market of Wad Madani Town	Female	≤21 to 40	Bachelor	≤ 10	Drug dispenser, counsellor and cashier.	Yes	Yes	Yes	No	Patient cantered and outcome oriented practice of pharmacists	TRUE	The organized Pharmacy staff members towards their responsibility.	Lack of communication skills	Patients perceptions and backgrounds	Pharmacists who work in community pharmacy should be well trained and updated through CPD (Continuous Professional Development) programs.
Living Area Pharmacy	Female	≤21 to 40	Bachelor	≤ 10	Cashier, drug dispenser,counsellor and manager.	Yes	Yes	Yes	Yes	Patient cantered and outcome oriented practice of pharmacists	TRUE	The organized Pharmacy staff members towards their responsibility.	Lack of continuous professional development	Patients perceptions and backgrounds	The community pharmacy design and structure should contain separate counselling area for pharmaceutical care practice.
Living Area Pharmacy	Female	41 to 60	Bachelor	≤ 10	Drug dispenser, counsellor and cashier.	Yes	Yes	Yes	No	counselling practice	TRUE	The organized Pharmacy staff members towards their responsibility.	Lack of time	Other pharmacy staff members	Awareness of community pharmacy practitioners should be increased through lectures and workshops.
Living Area Pharmacy	Male	≤21 to 40	M.Sc.	≤ 10	Cashier, drug dispenser,counsellor and manager.	Yes	Yes	Yes	Yes	Patient cantered and outcome oriented practice of pharmacists	TRUE	The organized Pharmacy staff members towards their responsibility.	Lack of training	Patients perceptions and backgrounds	Pharmacists who work in community pharmacy should be well trained and updated through CPD (Continuous Professional Development) programs.
Main Market of Wad Madani Town	Male	≤21 to 40	Bachelor	≤ 10	Cashier, drug dispenser,counsellor and manager.	Yes	Yes	Yes	Yes	Patient cantered and outcome oriented practice of pharmacists	TRUE	The desire and willingness of pharmacists have strong	Lack of knowledge	Patients perceptions and backgrounds	Pharmacists who work in community pharmacy should be well trained and updated through CPD (Continuous Professional Development) programs.
Main Market of Wad Madani Town	Male	≤21 to 40	Bachelor	≤ 10	Cashier, drug dispenser,counsellor and manager.	Yes	Yes	Yes	Yes	Patient cantered and outcome oriented practice of pharmacists	TRUE	The organized Pharmacy staff members towards their responsibility.	Lack of knowledge	Patients perceptions and backgrounds	Community pharmacy staff members should be complete and well organized.
Main Market of Wad Madani Town	Male	41 to 60	M.Sc.	≥ 40	Cashier, drug dispenser,counsellor and manager.	Yes	Yes	Yes	Yes	counselling practice	TRUE	The helpfulness of the pharmacy environment and structure.	Lack of training	Lack of information technology	Pharmacists who work in community pharmacy should be well trained and updated through CPD (Continuous Professional Development) programs.
Living Area Pharmacy	Male	≤21 to 40	Bachelor	11 to 20	Drug dispenser, counsellor and cashier.	Yes	Yes	Yes	No	Dispensary practice	FALSE	The desire and willingness of pharmacists have strong	Lack of communication skills	Absence of reimbursement for provided service	Awareness of community pharmacy practitioners should be increased through lectures and workshops.
Main Market of Wad Madani Town	Male	≤21 to 40	Bachelor	11 to 20	Cashier, drug dispenser,counsellor and manager.	Yes	Yes	Yes	Yes	Patient cantered and outcome oriented practice of pharmacists	TRUE	The helpfulness of the pharmacy environment and structure.	Lack of knowledge	Other pharmacy staff members	The community pharmacy design and structure should contain separate counselling area for pharmaceutical care practice.
Main Market of Wad Madani Town	Male	≤21 to 40	Bachelor	≤ 10	Cashier, drug dispenser,counsellor and manager.	Yes	Yes	Yes	Yes	Patient cantered and outcome oriented practice of pharmacists	TRUE	The desire and willingness of pharmacists have strong	Lack of continuous professional development	Absence of reimbursement for provided service	Awareness of community pharmacy practitioners should be increased through lectures and workshops.
Living Area Pharmacy	Female	≤21 to 40	Bachelor	≤ 10	Drug dispenser, counsellor and cashier.	Yes	Yes	Yes	No	Dispensary practice	FALSE	The helpfulness of the pharmacy environment and structure.	Lack of confidence	Patients perceptions and backgrounds	Professional relationship between community pharmacists and other health care providers should be improved and maintained.
Living Area Pharmacy	Male	≤21 to 40	Bachelor	≤ 10	Cashier, drug dispenser,counsellor and manager.	Yes	Yes	Yes	Yes	Patient cantered and outcome oriented practice of pharmacists	TRUE	The effective and helpful regulatory bodies.	Lack of continuous professional development	Patients perceptions and backgrounds	Regulatory bodies must be helpful in implementing effective pharmaceutical care practice.
Main Market of Wad Madani Town	Male	≤21 to 40	Bachelor	11 to 20	Cashier, drug dispenser,counsellor and manager.	Yes	Yes	Yes	Yes	Patient cantered and outcome oriented practice of pharmacists	TRUE	The organized Pharmacy staff members towards their responsibility.	Lack of continuous professional development	Absence of reimbursement for provided service	Awareness of community pharmacy practitioners should be increased through lectures and workshops.
Main Market of Wad Madani Town	Female	41 to 60	Bachelor	≤ 10	Drug dispenser, counsellor and cashier.	Yes	Yes	Yes	No	Patient cantered and outcome oriented practice of pharmacists	TRUE	The desire and willingness of pharmacists have strong	Lack of training	Other health care providers	Pharmacists who work in community pharmacy should be well trained and updated through CPD (Continuous Professional Development) programs.
Main Market of Wad Madani Town	Male	41 to 60	Bachelor	21 to 30	Cashier, drug dispenser,counsellor and manager.	Yes	Yes	Yes	Yes	Dispensary practice	FALSE	The organized Pharmacy staff members towards their responsibility.	Lack of knowledge	Other health care providers	Pharmacists who work in community pharmacy should be well trained and updated through CPD (Continuous Professional Development) programs.
Main Market of Wad Madani Town	Male	41 to 60	M.Sc.	21 to 30	Cashier, drug dispenser,counsellor and manager.	Yes	Yes	Yes	Yes	Patient cantered and outcome oriented practice of pharmacists	TRUE	The helpfulness of the pharmacy environment and structure.	Lack of continuous professional development	Community pharmacy structure and design	The community pharmacy design and structure should contain separate counselling area for pharmaceutical care practice.
Living Area Pharmacy	Male	≤21 to 40	Bachelor	≤ 10	Drug dispenser, counsellor and cashier.	Yes	Yes	Yes	No	Patient cantered and outcome oriented practice of pharmacists	TRUE	The organized Pharmacy staff members towards their responsibility.	Lack of knowledge	Patients perceptions and backgrounds	Regulatory bodies must be helpful in implementing effective pharmaceutical care practice.
Living Area Pharmacy	Female	41 to 60	Bachelor	11 to 20	Manager(at office within pharmacy).	No	No	No	Yes	counselling practice	TRUE	The organized Pharmacy staff members towards their responsibility.	Lack of knowledge	Lack of information technology	Awareness of community pharmacy practitioners should be increased through lectures and workshops.
Main Market of Wad Madani Town	Female	≤21 to 40	Bachelor	≤ 10	Cashier, drug dispenser,counsellor and manager.	Yes	Yes	Yes	Yes	counselling practice	TRUE	The helpfulness of the pharmacy environment and structure.	Lack of communication skills	Community pharmacy structure and design	The community pharmacy design and structure should contain separate counselling area for pharmaceutical care practice.
Living Area Pharmacy	Female	≤21 to 40	Bachelor	≤ 10	Counsellor at separate counselling area	No	No	Yes	No	Patient cantered and outcome oriented practice of pharmacists	TRUE	The organized Pharmacy staff members towards their responsibility.	None of these factors	Community pharmacy structure and design	Awareness of community pharmacy practitioners should be increased through lectures and workshops.
Living Area Pharmacy	Male	≤21 to 40	Bachelor	11 to 20	Manager(at office within pharmacy).	No	No	No	Yes	counselling practice	TRUE	The organized Pharmacy staff members towards their responsibility.	Lack of confidence	Community pharmacy structure and design	Professional relationship between community pharmacists and other health care providers should be improved and maintained.
Living Area Pharmacy	Female	≤21 to 40	Bachelor	≤ 10	Drug dispenser, counsellor and cashier.	Yes	Yes	Yes	No	counselling practice	TRUE	The organized Pharmacy staff members towards their responsibility.	Lack of communication skills	Community pharmacy structure and design	Pharmacists who work in community pharmacy should be well trained and updated through CPD (Continuous Professional Development) programs.
Living Area Pharmacy	Female	≤21 to 40	Bachelor	≤ 10	Cashier, drug dispenser,counsellor and manager.	Yes	Yes	Yes	Yes	counselling practice	TRUE	The helpfulness of the pharmacy environment and structure.	None of these factors	Other health care providers	Professional relationship between community pharmacists and other health care providers should be improved and maintained.
Living Area Pharmacy	Female	≤21 to 40	Bachelor	≤ 10	Drug dispenser, counsellor and cashier.	Yes	Yes	Yes	No	Dispensary practice	FALSE	The organized Pharmacy staff members towards their responsibility.	Lack of continuous professional development	Lack of information technology	Pharmacists who work in community pharmacy should be well trained and updated through CPD (Continuous Professional Development) programs.
Living Area Pharmacy	Male	≤21 to 40	Bachelor	≤ 10	Cashier, drug dispenser,counsellor and manager.	Yes	Yes	Yes	Yes	Patient cantered and outcome oriented practice of pharmacists	TRUE	The organized Pharmacy staff members towards their responsibility.	Lack of continuous professional development	Community pharmacy structure and design	Awareness of community pharmacy practitioners should be increased through lectures and workshops.
Living Area Pharmacy	Female	≤21 to 40	Bachelor	≤ 10	Drug dispenser, counsellor and cashier.	Yes	Yes	Yes	No	Patient cantered and outcome oriented practice of pharmacists	TRUE	The organized Pharmacy staff members towards their responsibility.	None of these factors	Community pharmacy structure and design	Pharmacists who work in community pharmacy should be well trained and updated through CPD (Continuous Professional Development) programs.
Living Area Pharmacy	Female	≤21 to 40	Bachelor	≤ 10	Drug dispenser, counsellor and cashier.	Yes	Yes	Yes	No	Patient cantered and outcome oriented practice of pharmacists	TRUE	The organized Pharmacy staff members towards their responsibility.	Lack of communication skills	Absence of reimbursement for provided service	Pharmacists who work in community pharmacy should be well trained and updated through CPD (Continuous Professional Development) programs.
Living Area Pharmacy	Female	41 to 60	Bachelor	11 to 20	Cashier, drug dispenser,counsellor and manager.	Yes	Yes	Yes	Yes	Dispensary practice	FALSE	The organized Pharmacy staff members towards their responsibility.	Lack of communication skills	Lack of information technology	Pharmacists who work in community pharmacy should be well trained and updated through CPD (Continuous Professional Development) programs.
Main Market of Wad Madani Town	Male	≤21 to 40	Bachelor	≤ 10	Drug dispenser, counsellor and cashier.	Yes	Yes	Yes	No	Dispensary practice	FALSE	The organized Pharmacy staff members towards their responsibility.	Lack of knowledge	Patients perceptions and backgrounds	Pharmacists who work in community pharmacy should be well trained and updated through CPD (Continuous Professional Development) programs.
Main Market of Wad Madani Town	Female	≤21 to 40	Bachelor	≤ 10	Drug dispenser, counsellor and cashier.	Yes	Yes	Yes	No	Patient cantered and outcome oriented practice of pharmacists	TRUE	The organized Pharmacy staff members towards their responsibility.	Lack of continuous professional development	Patients perceptions and backgrounds	Pharmacists who work in community pharmacy should be well trained and updated through CPD (Continuous Professional Development) programs.
Main Market of Wad Madani Town	Female	≤21 to 40	Bachelor	≤ 10	Cashier, drug dispenser,counsellor and manager.	Yes	Yes	Yes	Yes	Patient cantered and outcome oriented practice of pharmacists	TRUE	The organized Pharmacy staff members towards their responsibility.	Lack of knowledge	Lack of information technology	Pharmacists who work in community pharmacy should be well trained and updated through CPD (Continuous Professional Development) programs.
Living Area Pharmacy	Female	≤21 to 40	Bachelor	≤ 10	Cashier, drug dispenser,counsellor and manager.	Yes	Yes	Yes	Yes	Patient cantered and outcome oriented practice of pharmacists	TRUE	The helpfulness of the pharmacy environment and structure.	Lack of communication skills	Patients perceptions and backgrounds	Awareness of community pharmacy practitioners should be increased through lectures and workshops.
Living Area Pharmacy	Female	≤21 to 40	Bachelor	≤ 10	Cashier, drug dispenser,counsellor and manager.	Yes	Yes	Yes	Yes	counselling practice	TRUE	The organized Pharmacy staff members towards their responsibility.	None of these factors	Patients perceptions and backgrounds	Professional relationship between community pharmacists and other health care providers should be improved and maintained.
Living Area Pharmacy	Male	≤21 to 40	Bachelor	≤ 10	Cashier, drug dispenser,counsellor and manager.	Yes	Yes	Yes	Yes	counselling practice	TRUE	The organized Pharmacy staff members towards their responsibility.	Lack of continuous professional development	Patients perceptions and backgrounds	Pharmacists who work in community pharmacy should be well trained and updated through CPD (Continuous Professional Development) programs.
Living Area Pharmacy	Male	≤21 to 40	Bachelor	≤ 10	Cashier, drug dispenser,counsellor and manager.	Yes	Yes	Yes	Yes	counselling practice	TRUE	The organized Pharmacy staff members towards their responsibility.	Lack of training	Patients perceptions and backgrounds	Pharmacists who work in community pharmacy should be well trained and updated through CPD (Continuous Professional Development) programs.
Living Area Pharmacy	Male	≤21 to 40	Bachelor	≤ 10	Drug dispenser, counsellor and cashier.	Yes	Yes	Yes	No	Patient cantered and outcome oriented practice of pharmacists	TRUE	The organized Pharmacy staff members towards their responsibility.	Lack of communication skills	Absence of reimbursement for provided service	Pharmacists who work in community pharmacy should be well trained and updated through CPD (Continuous Professional Development) programs.
